# Supplementary material
Source: PubMed Central journal article supplement (PMC61146)

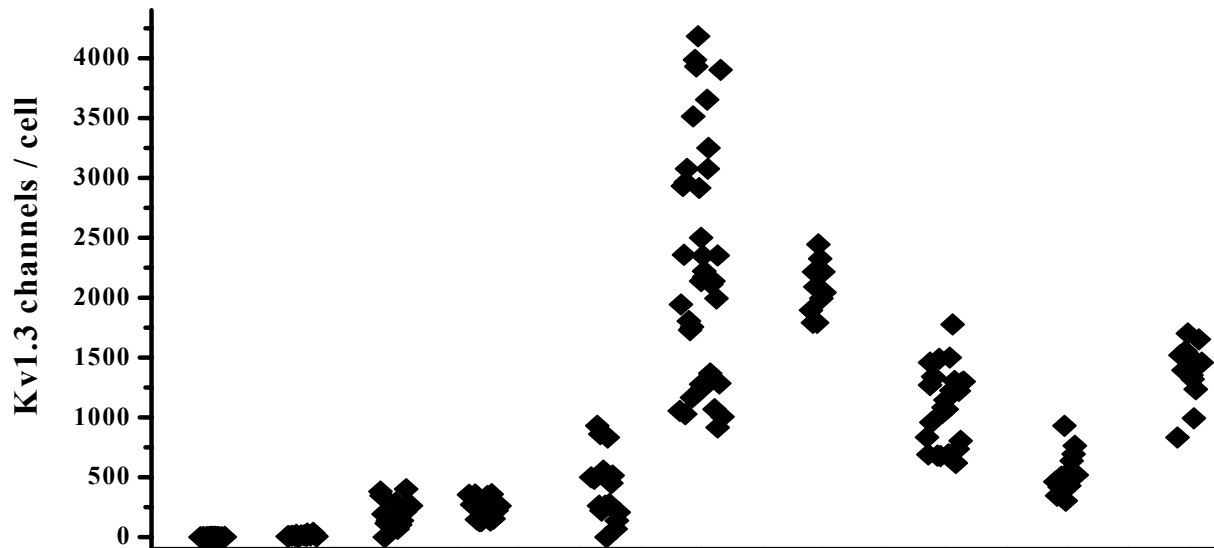

|                                           | resting T-cells   |                     | 1xConA                |                      | 2xConA                | PAS                    | Z                      | MBP-33                 | E10                   | CB8                    |
|-------------------------------------------|-------------------|---------------------|-----------------------|----------------------|-----------------------|------------------------|------------------------|------------------------|-----------------------|------------------------|
|                                           | spleen            | LN                  | spleen                | CD4 <sup>+</sup> LN  | CD4 <sup>+</sup> LN   |                        |                        |                        |                       |                        |
| Kv1.3 channels / cell                     | 1 ± 1<br>(n = 13) | 14 ± 10<br>(n = 13) | 187 ± 106<br>(n = 22) | 246 ± 86<br>(n = 17) | 200 ± 276<br>(n = 17) | 2529 ± 961<br>(n = 36) | 1992 ± 336<br>(n = 22) | 1097 ± 328<br>(n = 25) | 506 ± 179<br>(n = 17) | 1381 ± 246<br>(n = 13) |
| Capacitance [pF]                          | 1.4 ± 0.5         | 1.2 ± 0.3           | 6.0 ± 2.0             | 4.1 ± 0.7            | 5.0 ± 1.5             | 5.1 ± 1.2              | 4.8 ± 1.1              | 4.4 ± 1.3              | 4.6 ± 1.6             | 7.13 ± 0.9             |
| Kv1.3 density (channels/μm <sup>2</sup> ) | 0.007             | 0.11                | 0.31                  | 0.59                 | 0.40                  | 4.9                    | 4.1                    | 2.49                   | 1.1                   | 1.9                    |
| Ratio Kv1.3 / IK                          | 0.14              | 1.0                 | 0.6                   | 0.7                  | 0.7                   | 21                     | 66                     | 12                     | 4                     | 42                     |
| IKCa1 channels / cell                     | 7 ± 6<br>(n = 13) | 13 ± 9<br>(n = 13)  | 309 ± 149<br>(n = 21) | 349 ± 50<br>(n = 12) | 272 ± 130<br>(n = 16) | 120 ± 34<br>(n = 26)   | 30 ± 19<br>(n = 17)    | 88 ± 30<br>(n = 16)    | 124 ± 11<br>(n = 13)  | 33<br>(n = 9)          |
| Capacitance [pF]                          | 1.3 ± 0.5         | 1.1 ± 0.2           | 5.5 ± 2.3             | 4.4 ± 0.9            | 5.2 ± 1.6             | 5.3 ± 1.4              | 4.9 ± 0.8              | 4.1 ± 1.6              | 5.2 ± 1.4             | 7.3 ± 1.0              |
| IKCa1 density (channels/μm <sup>2</sup> ) | 0.05              | 0.11                | 0.56                  | 0.79                 | 0.52                  | 0.22                   | 0.06                   | 0.2                    | 0.23                  | 0.04                   |
|                                           | spleen            | LN                  | 1xConA                |                      | 2xConA                | PAS                    | Z                      | MBP-33                 | E10                   | CB8                    |
|                                           | resting T-cells   |                     |                       |                      | CD4 <sup>+</sup> LN   |                        |                        |                        |                       |                        |

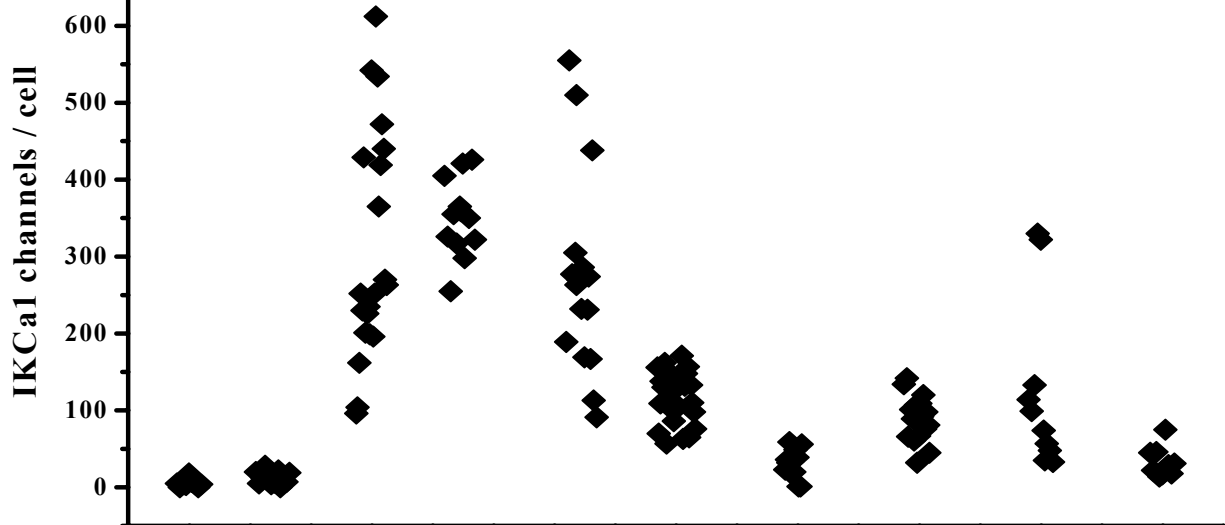

Supplement: pnas_98_24_13942__9.pdf [file pnas_98_24_13942__9.pdf]
