# Supplementary material
Source: PubMed Central journal article supplement (PMC61146)
Supplement: pnas_98_24_13942__11.pdf [file pnas_98_24_13942__11.pdf]

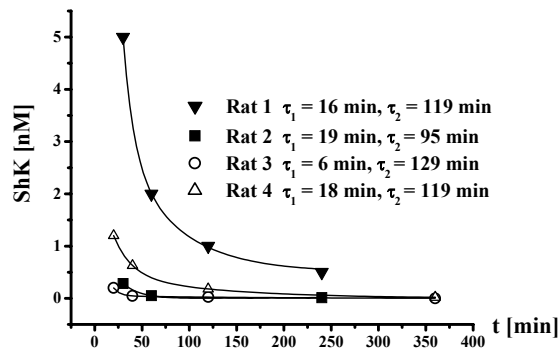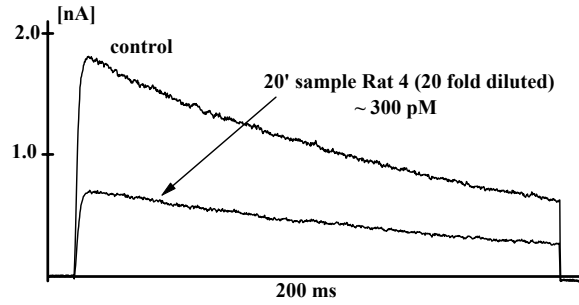

A, Serum concentrations of ShK after a single 16  $\mu$ g i.p. injection.

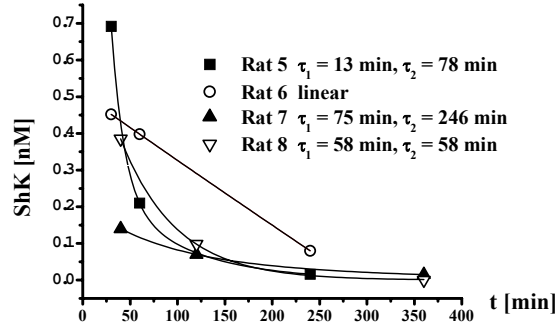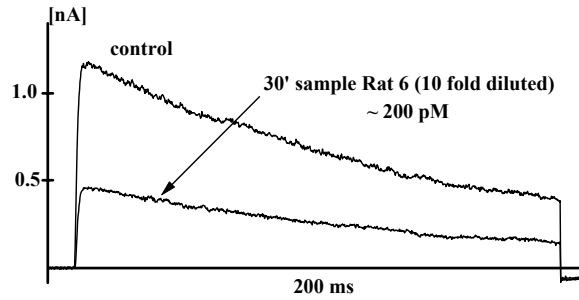

B, Serum concentrations of ShK after a single 16  $\mu$ g s.c. injection.

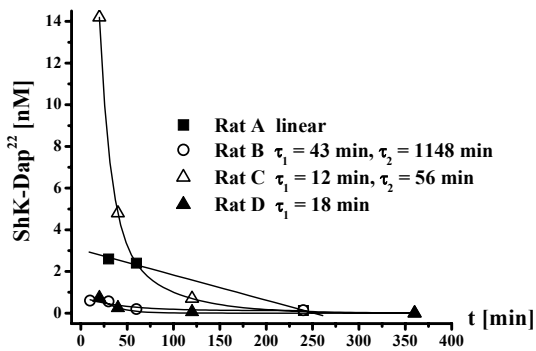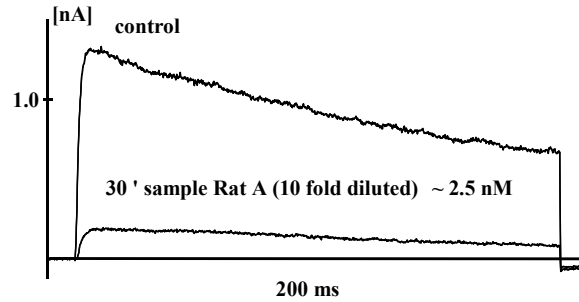

C, Serum concentrations of ShK-Dap<sup>22</sup> after a single 16  $\mu$ g i.p. injection.

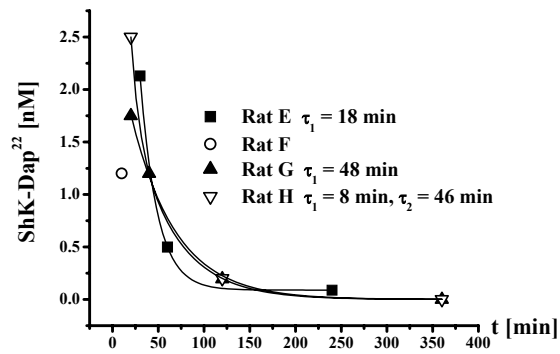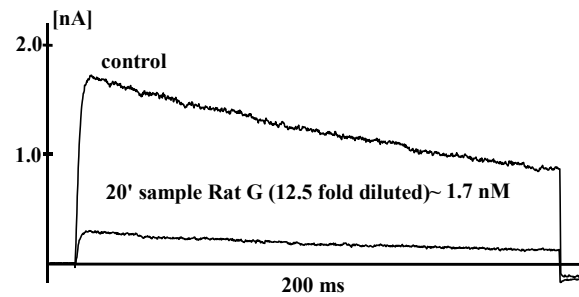

D, Serum concentrations of ShK-Dap<sup>22</sup> after a single 16  $\mu$ g s.c. injection.
