# Supplementary material
Source: PubMed Central journal article supplement (PMC61146)

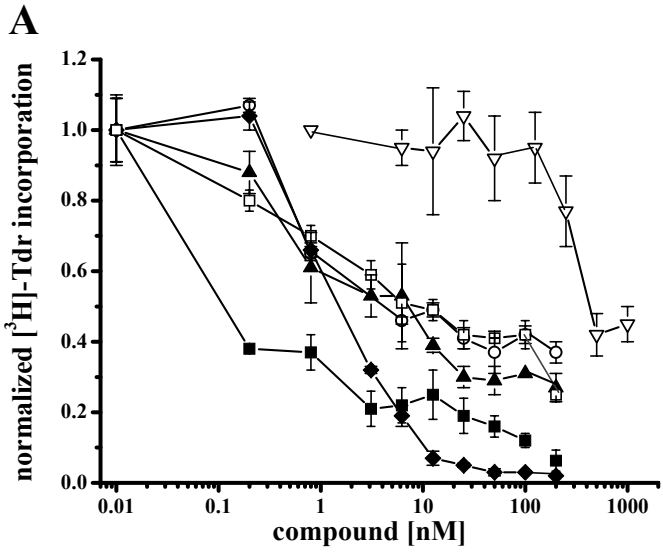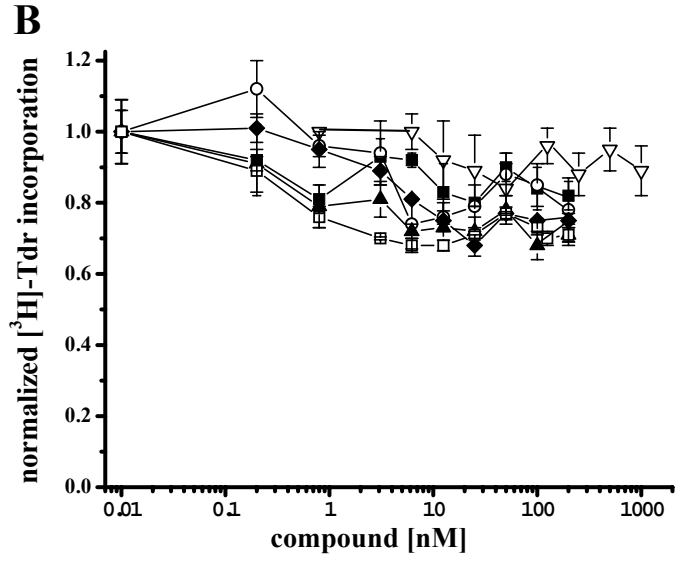

Supplement: pnas_98_24_13942__10.pdf [file pnas_98_24_13942__10.pdf]

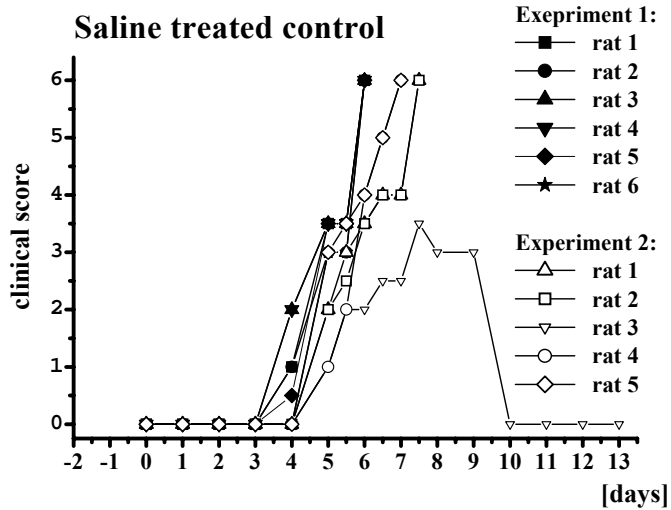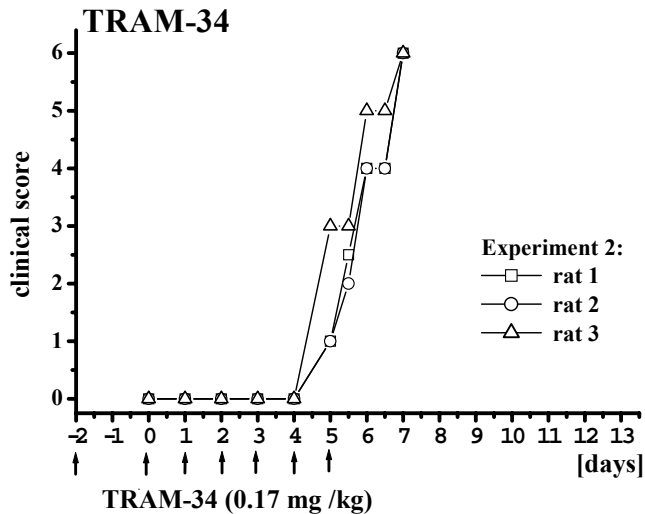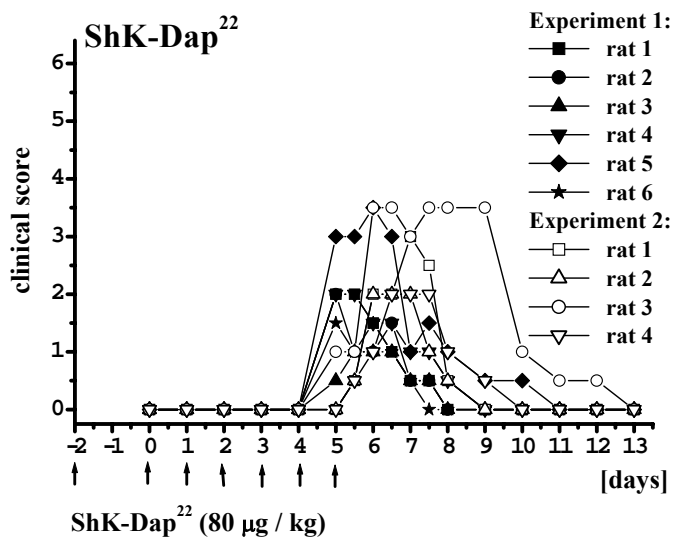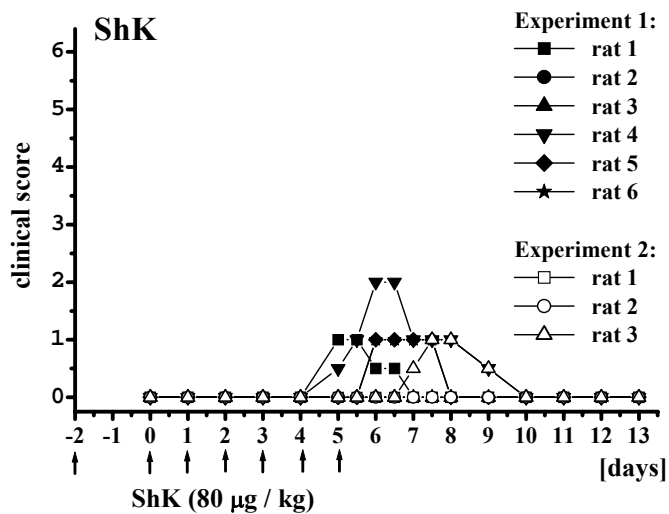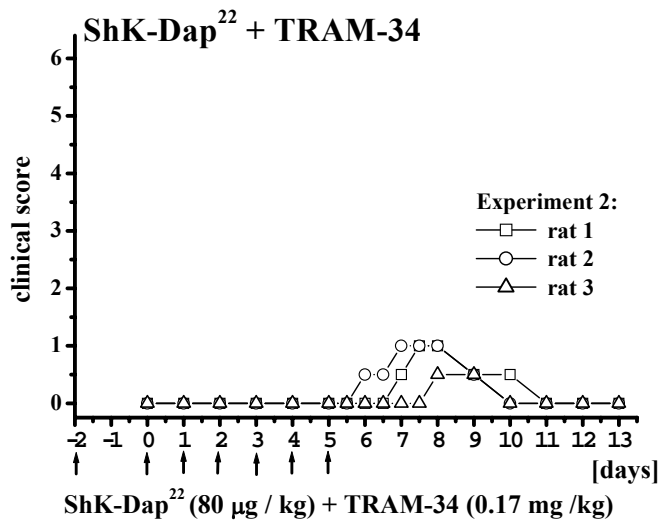

Supplement: pnas_98_24_13942__12.pdf [file pnas_98_24_13942__12.pdf]

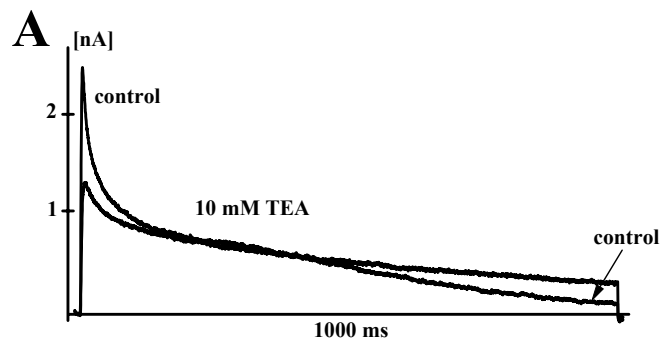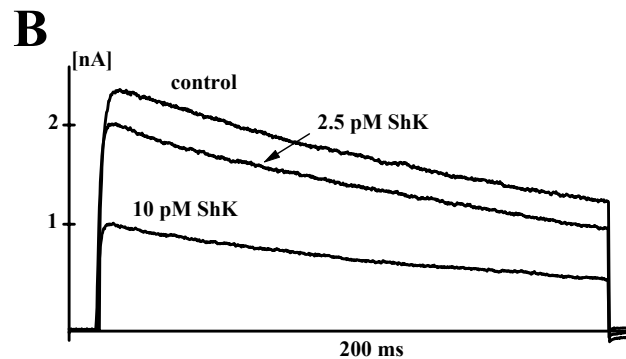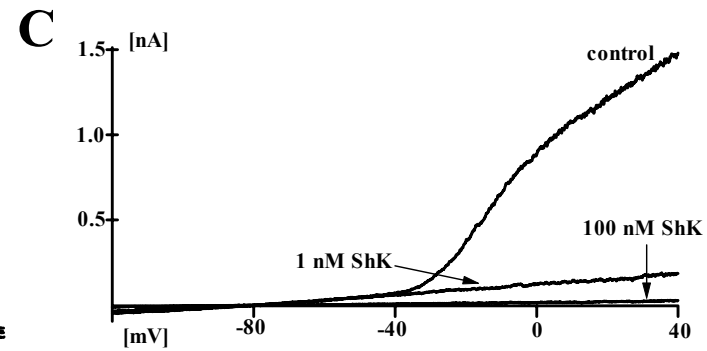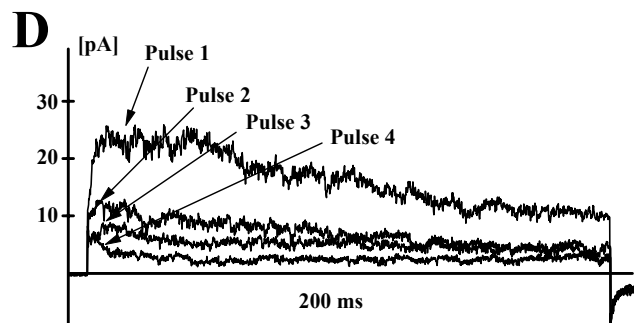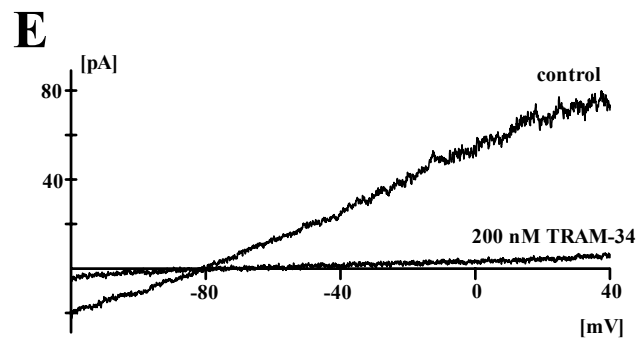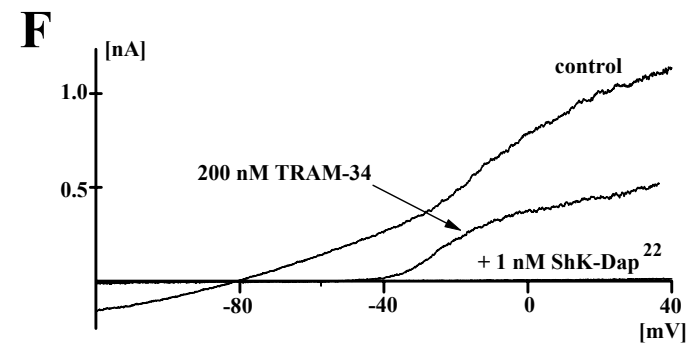

Supplement: pnas_98_24_13942__8.pdf [file pnas_98_24_13942__8.pdf]
